# Supplementary material
Source: publisher site journal article supplement (https://www.dovepress.com/get_supplementary_file.php?f=430786.docx)

Supplementary Figure 1. The expression of prognostic genes in the training set and GSE53624 dataset.

***p<0.001


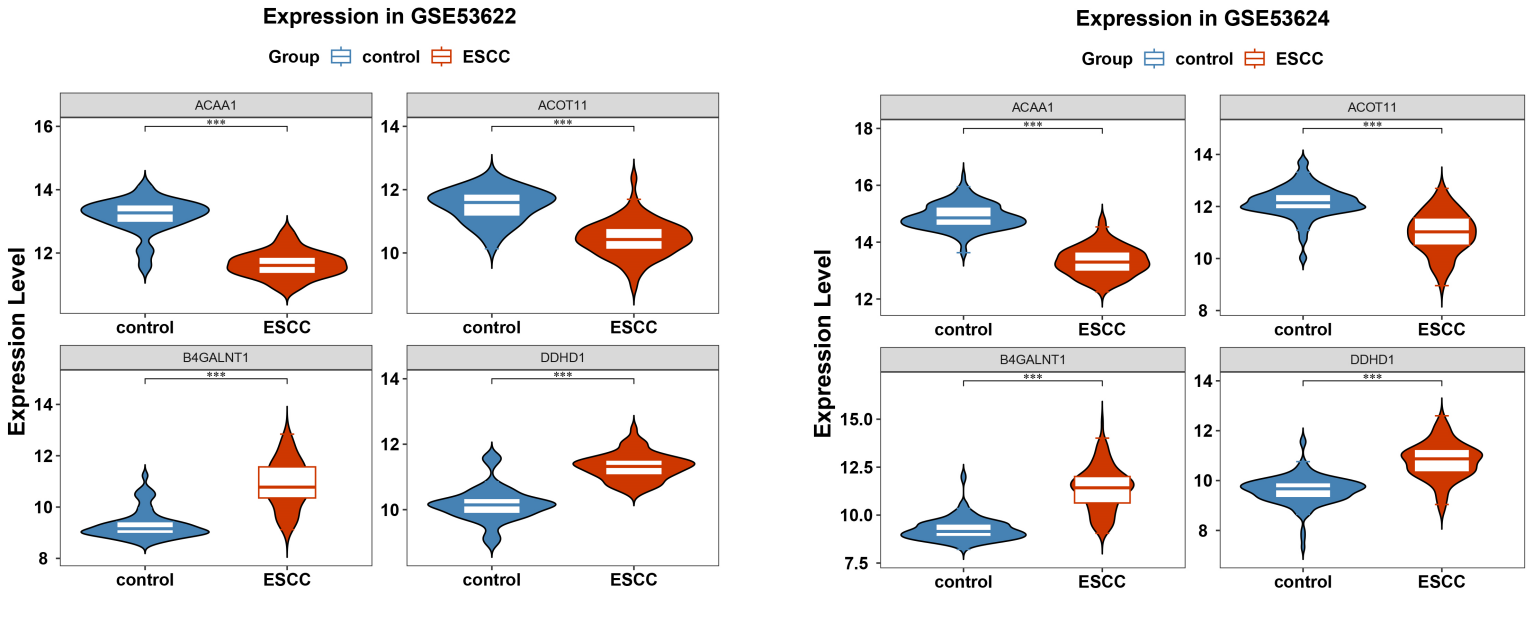

Supplement: Supplementary file 1 [file get_supplementary_file.php]
